# Supplementary material for: Colorimetric detection of residual hydrogen peroxide in soaked food based on Au@Ag nanorods
Source: Royal Society of Chemistry journal article supplement (doi:10.1039/c7ay02819a), 2018-01-01
Supplement: c7ay02819a1.pdf [file c7ay02819a1.pdf]

## Supporting information for

### Colorimetric detection of residual hydrogen peroxide in soaked food based on Au@Ag nanorods

Qingai Chen,<sup>a</sup> Tianran Lin,<sup>b</sup> Jianli Huang,<sup>c</sup> Yi Chen,<sup>c</sup> Liangqia Guo,<sup>b,\*</sup> Fengfu Fu<sup>b</sup>

<sup>a</sup> Department of Tourism and Hotel Management, Fujian Business University, Fuzhou, 350012, China

<sup>b</sup> Ministry of Education Key Laboratory for Analytical Science of Food Safety and Biology, Fujian Provincial Key Laboratory of Analysis and Detection Technology for Food Safety, College of Chemistry, Fuzhou University, Fuzhou, 350116, China

<sup>c</sup> Institute of Grain and Oil Quality Supervision and Test of Fujian, Fuzhou, 350012, China

Email: lqguo@fzu.edu.cn, Tel: 086-591-22866135

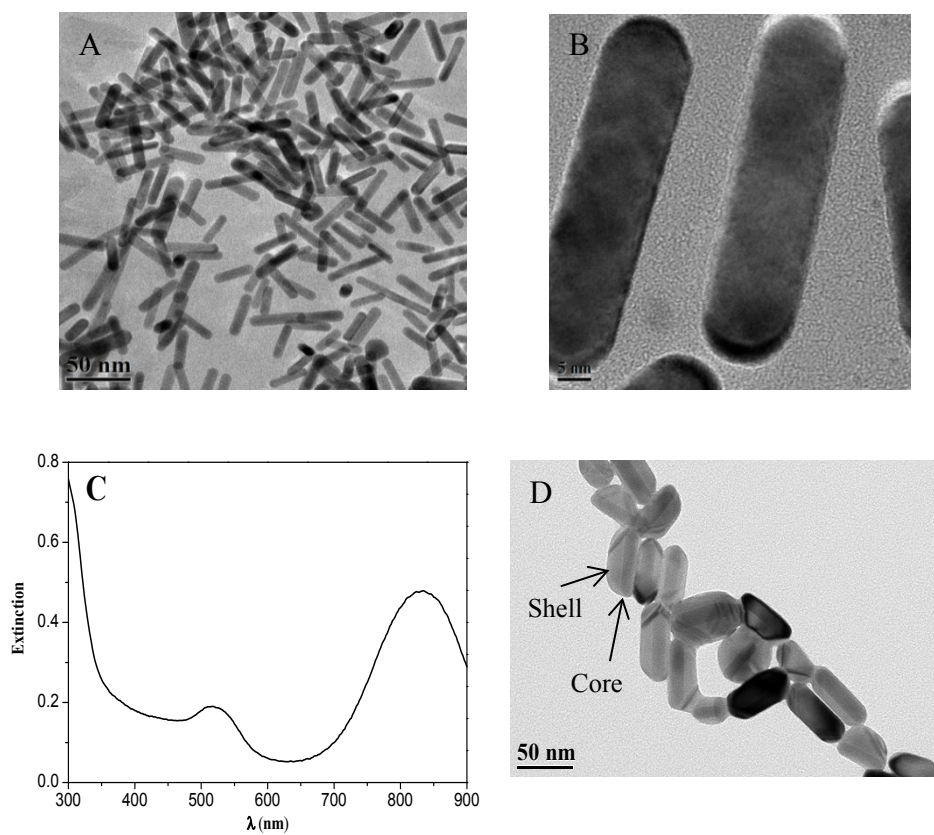

**Figure S1.** TEM images (A, B) and extinction spectrum (C) of Au NRs, TEM images of Au@Ag NRs (D)

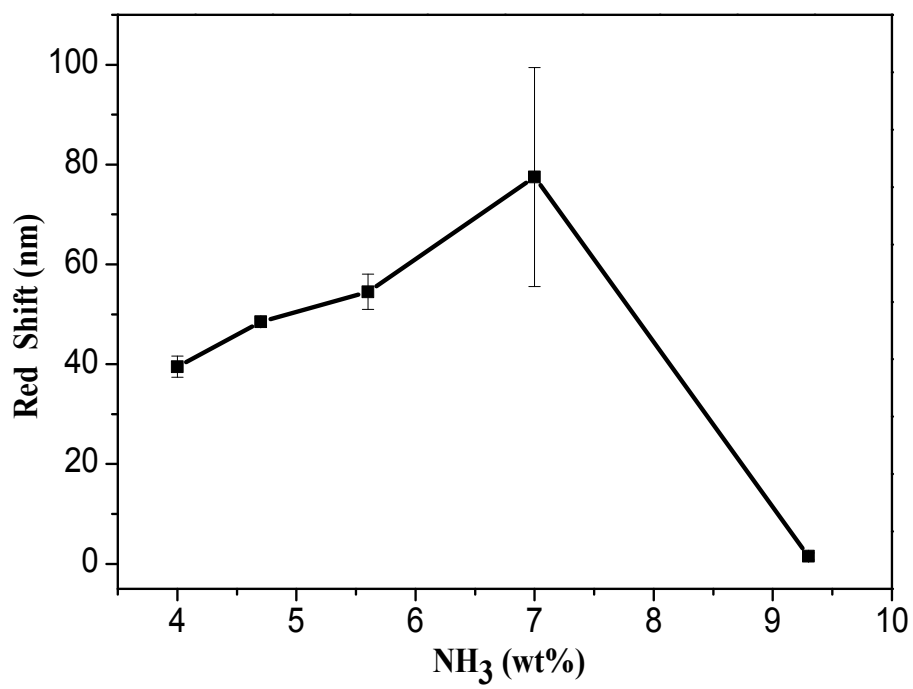

**Figure S2.** Effects of NH<sub>3</sub> concentration (4.0, 4.7, 5.6, 7.0, 9.3%) on the red shift of Au@Ag NRs at the presence of 60  $\mu\text{mol L}^{-1}$  H<sub>2</sub>O<sub>2</sub>.

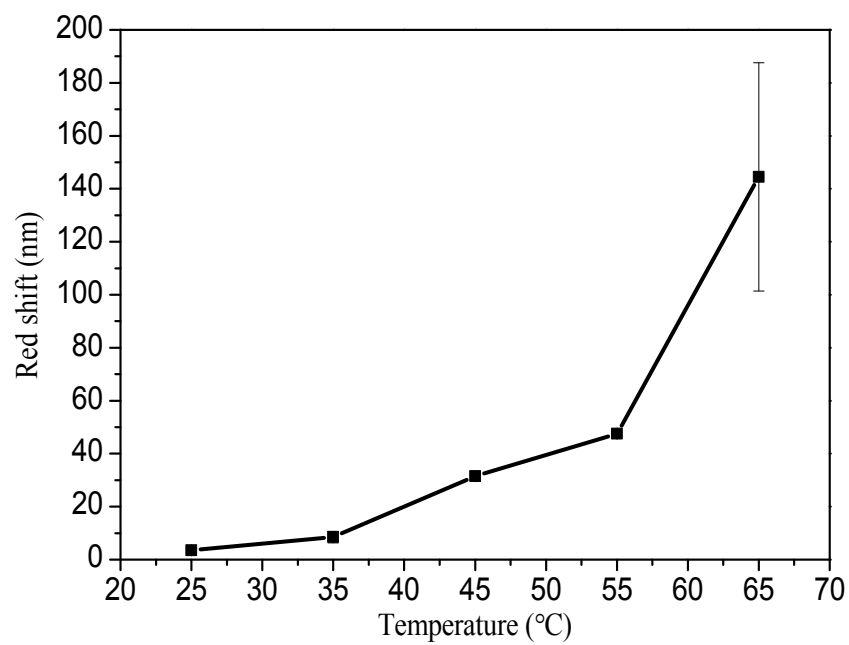

**Figure S3.** Effects of temperature on the red-shift of Au@Ag NRs at the presence of  $60 \mu\text{mol L}^{-1}$   $\text{H}_2\text{O}_2$ .

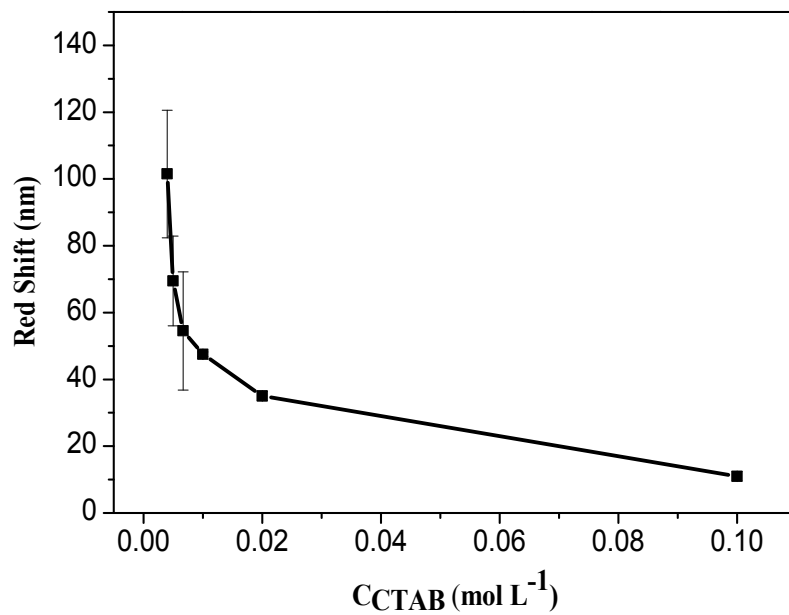

**Figure S4.** Effects of CTAB concentration (0.1, 0.02, 0.01, 0.0067, 0.005, 0.004 mol L<sup>-1</sup>) on the red shift of Au@Ag NRs at the presence of 60  $\mu\text{mol L}^{-1}$  H<sub>2</sub>O<sub>2</sub>.

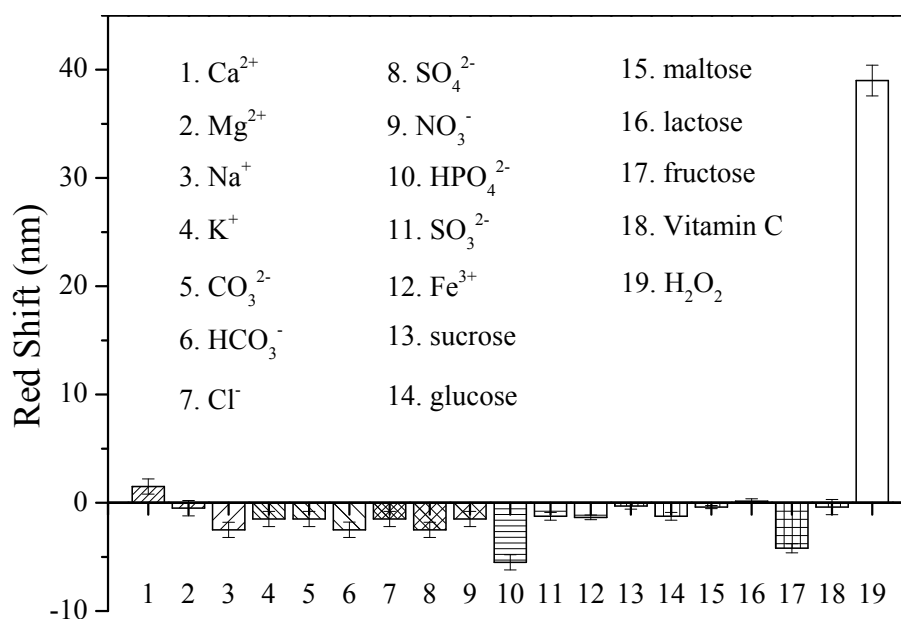

**Figure S5.** Red-shift of longitudinal SPR of Au@Ag NRs in the presence of possible interferents and H<sub>2</sub>O<sub>2</sub>, respectively. (The error bars represent the standard deviation of three measurements) (Ca<sup>2+</sup>: 5 mmol L<sup>-1</sup>, Mg<sup>2+</sup>: 5 mmol L<sup>-1</sup>, Na<sup>+</sup>: 5 mmol L<sup>-1</sup>, K<sup>+</sup>: 5 mmol L<sup>-1</sup>, NO<sub>3</sub><sup>-</sup>: 1 mmol L<sup>-1</sup>, CO<sub>3</sub><sup>2-</sup>: 1 mmol L<sup>-1</sup>, HCO<sub>3</sub><sup>-</sup>: 1 mmol L<sup>-1</sup>, Cl<sup>-</sup>: 1 mmol L<sup>-1</sup>, SO<sub>4</sub><sup>2-</sup>: 1 mmol L<sup>-1</sup>, HPO<sub>4</sub><sup>2-</sup>: 1 mmol L<sup>-1</sup>, Fe<sup>3+</sup>: 0.5 mmol L<sup>-1</sup>, sucrose: 1 mmol L<sup>-1</sup>, glucose: 1 mmol L<sup>-1</sup>, maltose: 1 mmol L<sup>-1</sup>, lactose: 1 mmol L<sup>-1</sup>, fructose: 0.5 mmol L<sup>-1</sup>, vitamin C: 1 mmol L<sup>-1</sup>, H<sub>2</sub>O<sub>2</sub>: 60 μmol L<sup>-1</sup>)
